# Supplementary material
Source: MDPI journal article supplement (https://www.mdpi.com/2079-6439/10/12/108)
Supplement: s1 [file s1 › fibers-2048578-supplementary.pdf]

# Supplementary information

## **Carbon fibers from wet spun cellulose-lignin precursors using the cold alkali process**

Andreas Bengtsson<sup>1,\*</sup>, Alice Landmér<sup>1</sup>, Lars Norberg<sup>1</sup>, Shun Yu<sup>1</sup>, Monica Ek<sup>2</sup>, Elisabet Brännvall<sup>3</sup>, Maria Sedin<sup>1</sup>

<sup>1</sup>*RISE Research Institutes of Sweden, Division Bioeconomy and Health, Materials and Surface Design, Drottning Kristinas väg 61, 114 28 Stockholm, Sweden*

<sup>2</sup>*Department of Fibre and Polymer Technology, School of Engineering Sciences in Chemistry, Biotechnology and Health, KTH Royal Institute of Technology, Stockholm, Sweden*

<sup>3</sup>*Department of Engineering Pedagogics, School of Engineering Sciences in Chemistry, Biotechnology and Health, KTH Royal Institute of Technology, Stockholm, Sweden*

\*Corresponding author e-mail: [andreas.bengtsson@ri.se](mailto:andreas.bengtsson@ri.se)

**Number of Pages: 7**

**Number of Figures: 6** (Figures S1–S6)

**Number of Tables: 2** (Tables S1–S2)

## Figures

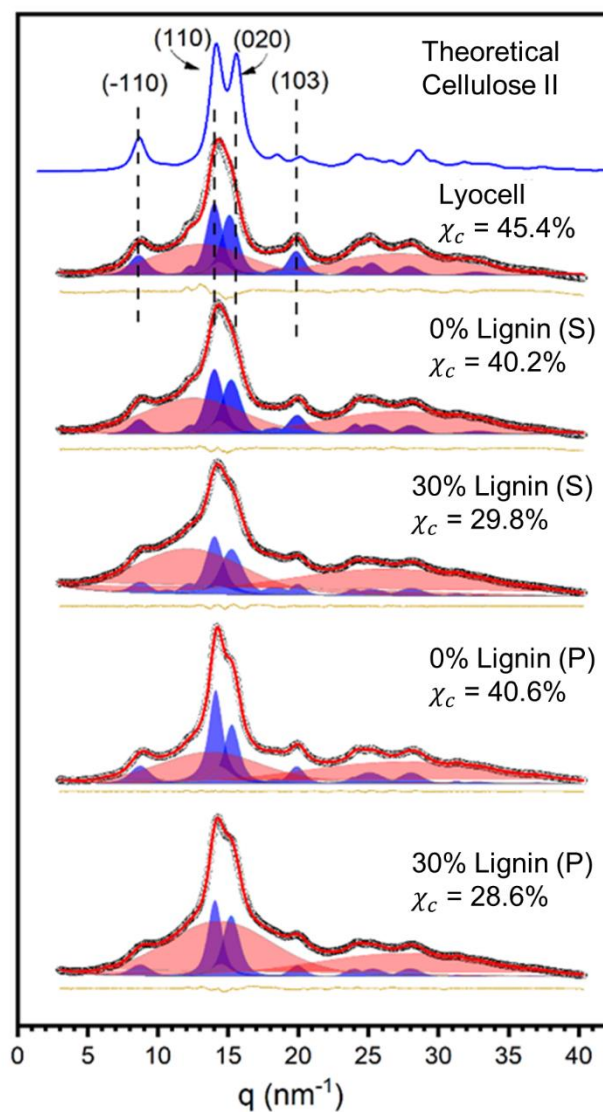

**Figure S1.** WAXS diffractograms (1D) of the System S and P precursors and the Lyocell reference, showing the assigned crystalline reflections of cellulose II and deconvoluted fitting procedure where the red areas indicate the amorphous contribution.

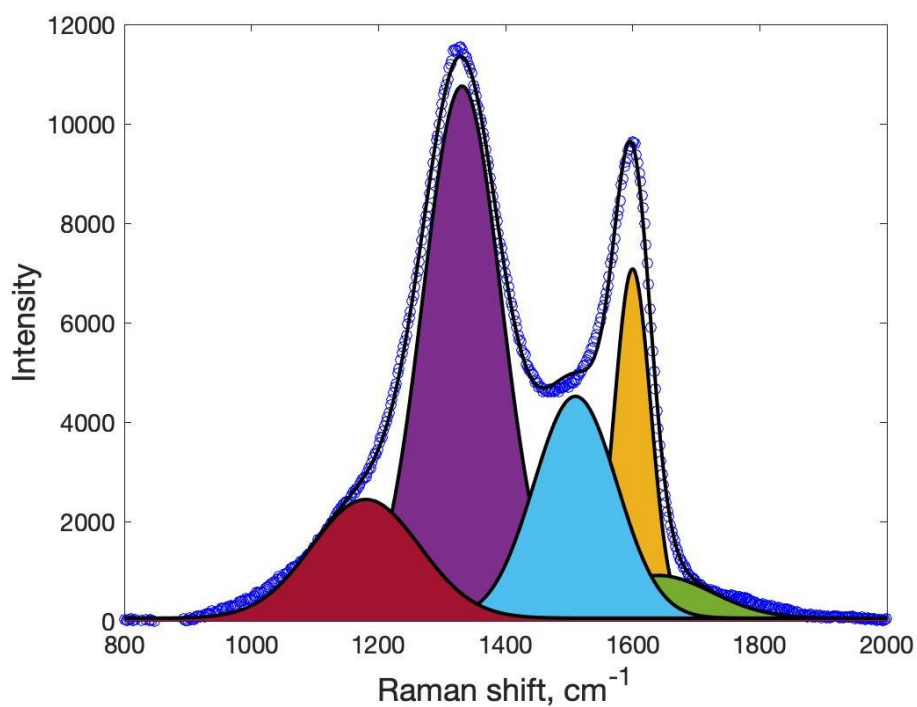

**Figure S2.** Example of Raman peak fitting performed on the continuously derived carbon fibre sample with stretching (1.3 cN/tex), using 5 Gaussian peaks deconvolution for calculation of  $I_D/I_G$ . Yellow = G band; Purple = D1 band; Green = D2 band; Teal = D3 band; Red = D4 band.

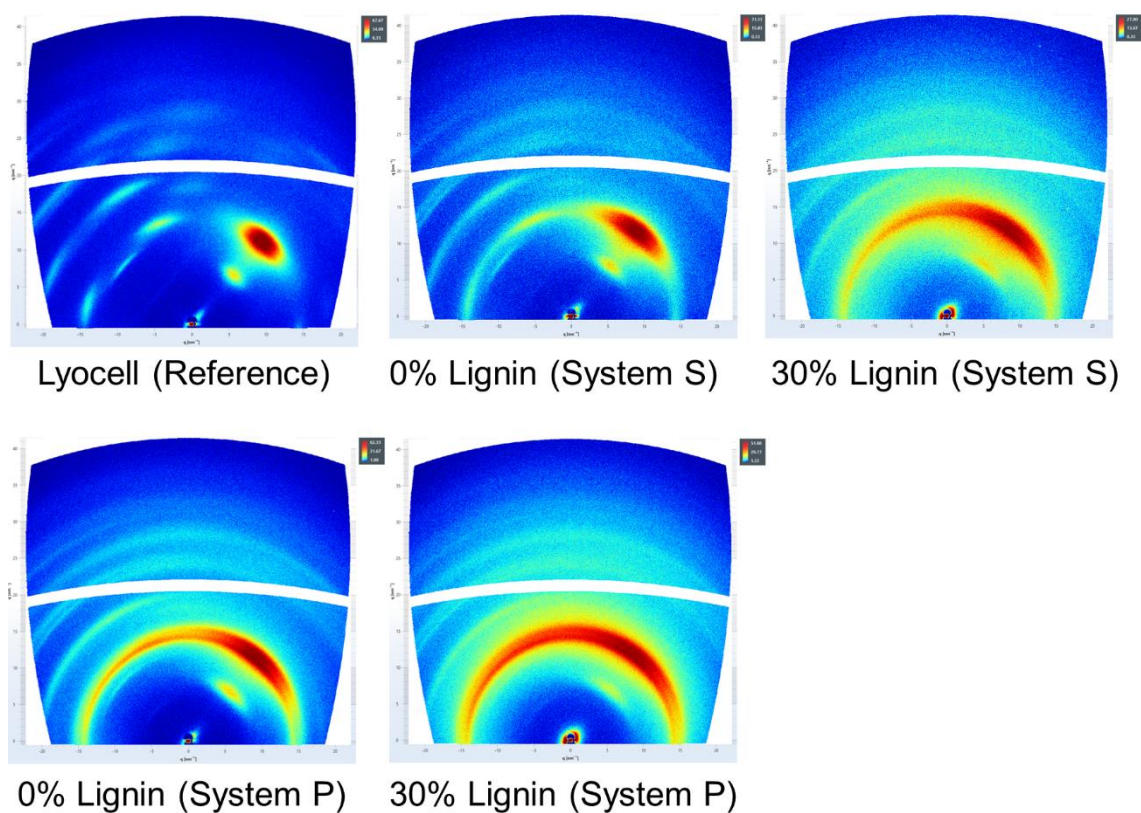

**Figure S3.** Scattering patterns (2D) from WAXS of the precursors and the lyocell reference.

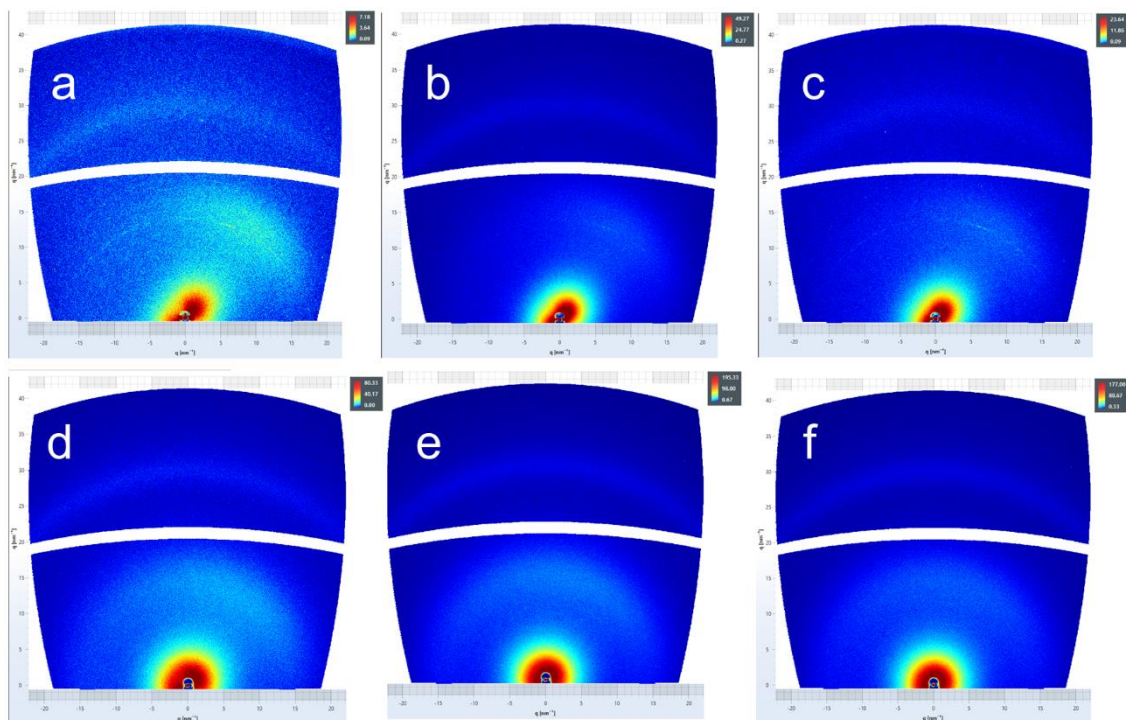

**Figure S4.** 2D WAXS diffraction patterns of batchwise (top) and continuously (bottom) derived CFs, showing (a) CF ( $E=77$  GPa) from the System S precursor with 0% lignin, (b) CF ( $E=55$  GPa) from the System P precursor with 0% lignin, (c) CF ( $E=53$  GPa) from the System P precursor with 30% lignin, (d) CF ( $E=46$  GPa) from the System P precursor with 0% lignin carbonised with a tension of 1.3 cN/tex, (e) CF ( $E=35$  GPa) from the System P precursor with 0% lignin carbonised with a tension of 0.2 cN/tex and (f) CF ( $E=33$  GPa) from the System P precursor with 30% lignin carbonised with a tension of 0.2 cN/tex.

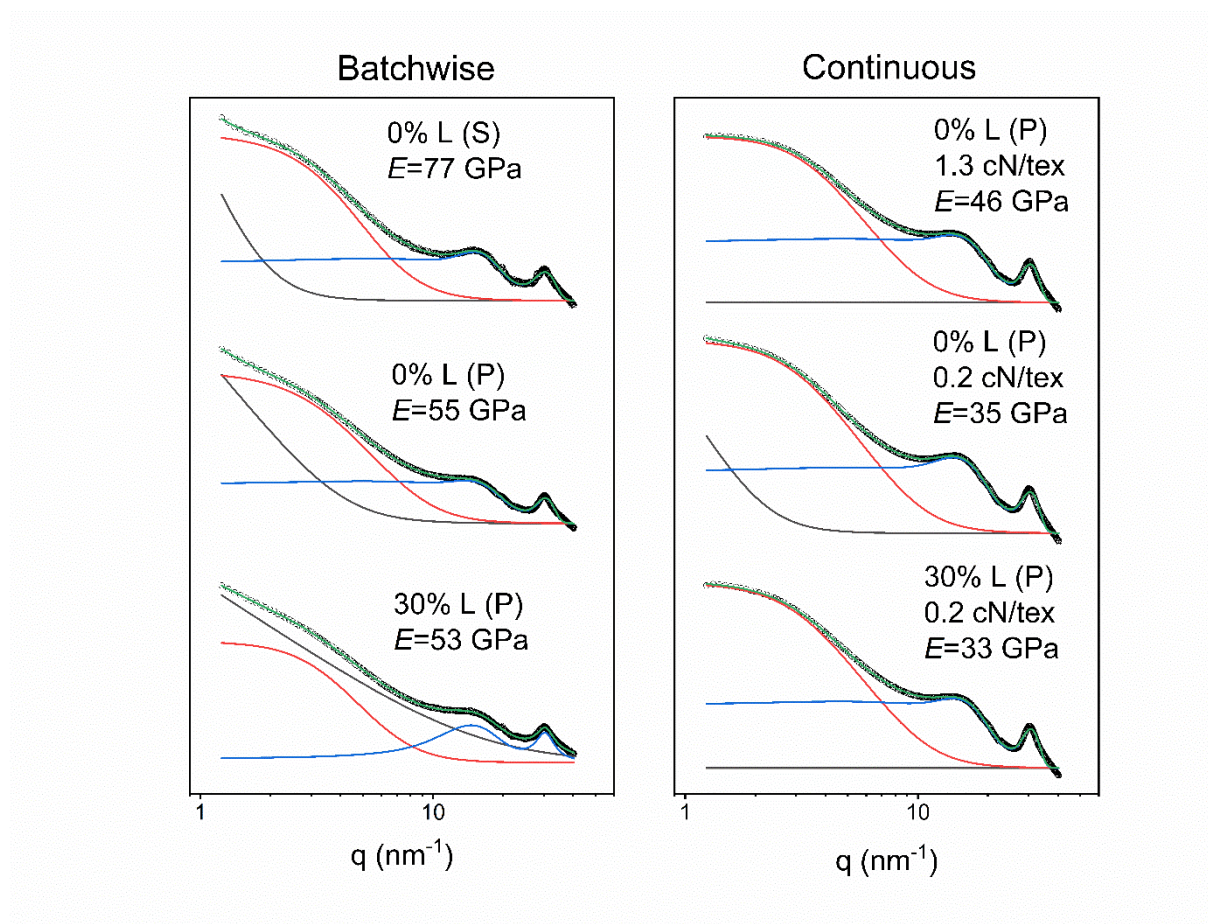

**Figure S5.** WAXS diffractograms (1D) of CFs prepared via batchwise and continuous conversion of System S and P precursors with different lignin content.

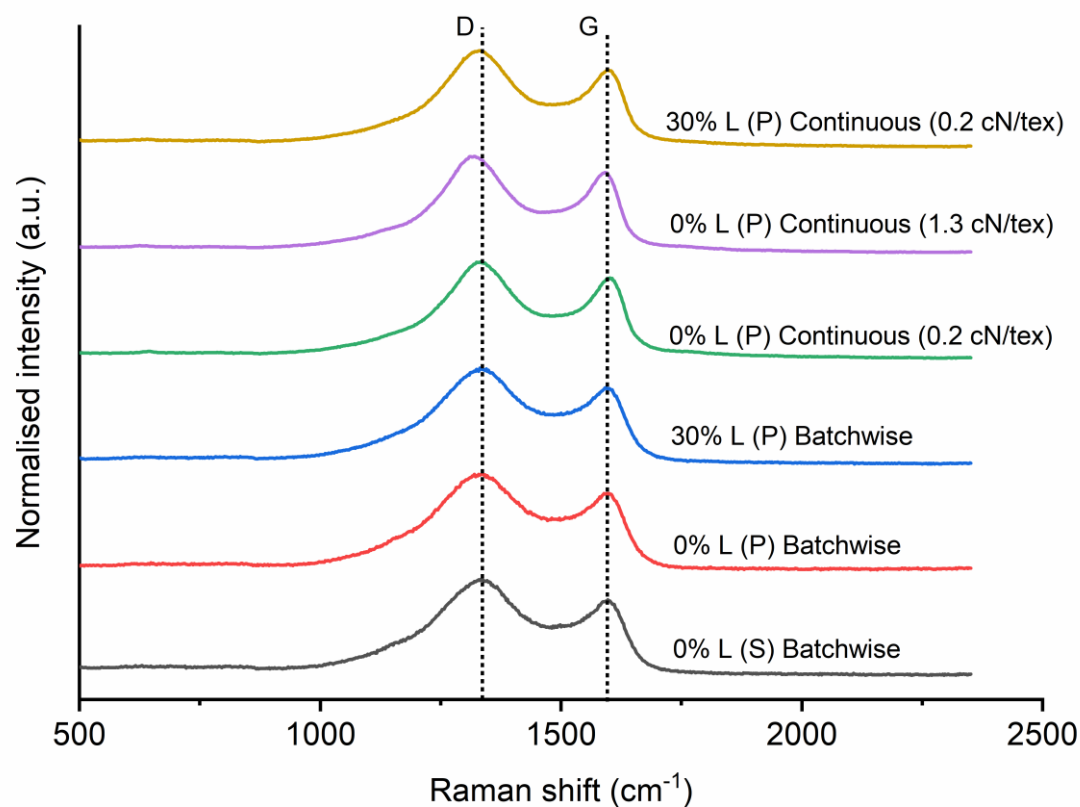

**Figure S6.** Raman spectra of CFs derived from cellulose-lignin precursors via batchwise and continuous conversion. L = Lignin; S = System S; P = System P.

## Tables

**Table S1.** Gravimetric yield and elemental composition of CFs.

| Conversion | Lignin  | System | Stab. | Carb. | Total | Elemental composition |    |     |     |
|------------|---------|--------|-------|-------|-------|-----------------------|----|-----|-----|
| mode       | content |        | yield | yield | yield | (wt%)                 |    |     |     |
|            | (wt%)   |        | (wt%) | (wt%) | (wt%) | C                     | O  | S   | P   |
| Batchwise  | 0       | S      | 98    | 12    | 12    | 85                    | 14 | 0   | 0   |
|            | 10      | S      | 97    | 14.5  | 14    | 85                    | 14 | 0.5 | 0   |
|            | 30      | S      | 88    | 34    | 30    | 87                    | 12 | 1   | 0   |
|            | 0       | P      | 63    | 47    | 30    | 90                    | 7  | 0   | 1.7 |
|            | 30      | P      | 70    | 55    | 39    | 90                    | 7  | 0.5 | 2.3 |
| Continuous | 0       | P      | 63    | 68    | 43    | 90                    | 7  | 0   | 1.7 |
|            | 30      | P      | 73    | 60    | 44    | 90                    | 7  | 0.5 | 2.9 |

**Table S2.** Summary of the tensile properties of the CFs prepared in this work.  $E$  = Young's modulus;  $\sigma$  = Tensile strength;  $\varepsilon$  = Break elongation.

| Conversion mode    | Lignin (wt%) | System | Tension (cN/tex) | Diameter ( $\mu\text{m}$ ) | $E$ (wt%) | $\sigma$ (GPa) | $\varepsilon$ (%) |
|--------------------|--------------|--------|------------------|----------------------------|-----------|----------------|-------------------|
| Batch              | 0            | S      | — <sup>b</sup>   | 6.0 (0.8)                  | 71 (15)   | 1.17 (0.29)    | 1.70 (0.30)       |
| Batch <sup>a</sup> | 0            | S      | — <sup>b</sup>   | 5.8 (0.7)                  | 77 (12)   | 0.88 (0.20)    | 1.16 (0.26)       |
| Batch              | 10           | S      | — <sup>b</sup>   | 6.8 (0.8)                  | 71 (11)   | 0.96 (0.24)    | 1.34 (0.27)       |
| Batch              | 30           | S      | — <sup>b</sup>   | 12.7 (0.7)                 | 54 (6)    | 0.64 (0.11)    | 1.19 (0.18)       |
| Batch              | 0            | P      | — <sup>b</sup>   | 9.8 (0.6)                  | 55 (5)    | 0.69 (0.16)    | 1.27 (0.26)       |
| Batch              | 30           | P      | — <sup>b</sup>   | 11.2 (0.8)                 | 53 (6)    | 0.65 (0.12)    | 1.23 (0.22)       |
| Continuous         | 0            | P      | 0.2              | 11.4 (0.5)                 | 35 (2)    | 0.57 (0.12)    | 1.64 (0.30)       |
| Continuous         | 0            | P      | 0.4              | 10.9 (0.6)                 | 38 (3)    | 0.61 (0.10)    | 1.63 (0.25)       |
| Continuous         | 0            | P      | 1.0              | 9.2 (0.3)                  | 45 (3)    | 0.67 (0.15)    | 1.49 (0.30)       |
| Continuous         | 0*           | P      | 1.3              | 9.2 (0.4)                  | 46 (4)    | 0.68 (0.10)    | 1.45 (0.21)       |
| Continuous         | 30           | P      | 0.2              | 11.5 (0.4)                 | 33 (2)    | 0.48 (0.07)    | 1.45 (0.21)       |

<sup>a</sup>Stabilised (275 °C) and carbonised (1100 °C) with the profile used for System P fibres; <sup>b</sup>Mounted on graphite frames to prevent shrinkage
